# Supplementary material for: miRGalaxy: Galaxy-Based Framework for Interactive Analysis of microRNA and isomiR Sequencing Data
Source: MDPI journal article supplement (doi:10.3390/cancers13225663), 2021-11-12

# IsomiR profile report

## sRNA length distribution

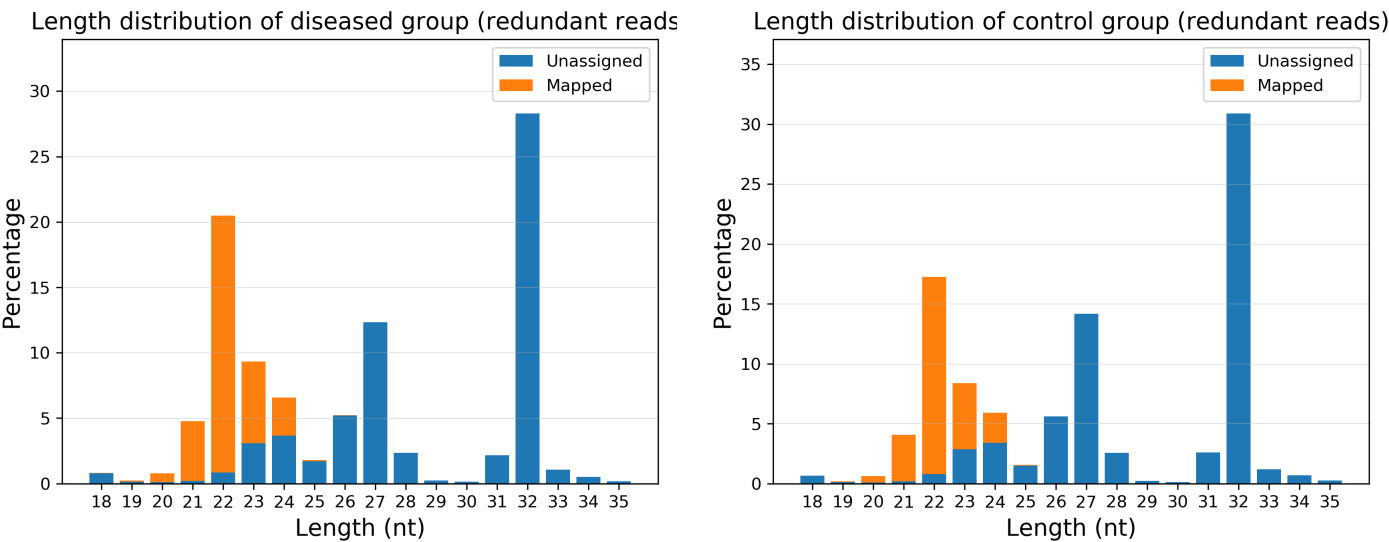

Mapped and unmapped reads to custom precursor arm reference DB (5p and 3p arms) in diseased (left) and control (right) groups

## Templated and non-templated isomiRs

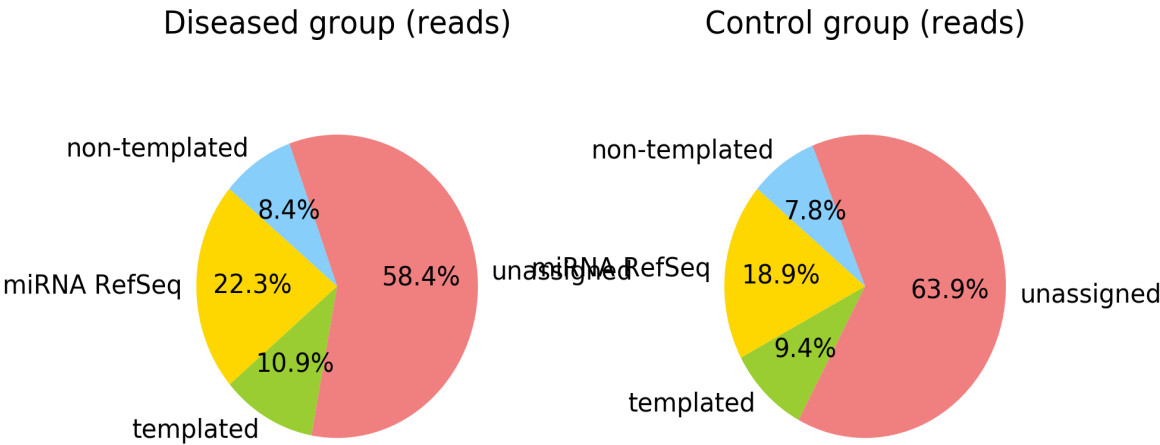

RefSeq miRNAs, templated isomiRs, non-templated isomiRs and unassigned sequences as percentage of total sRNA reads in diseased (left) and control (right) groups

# Templated isomiR subtypes

## Templated isomiR profile (redundant reads)

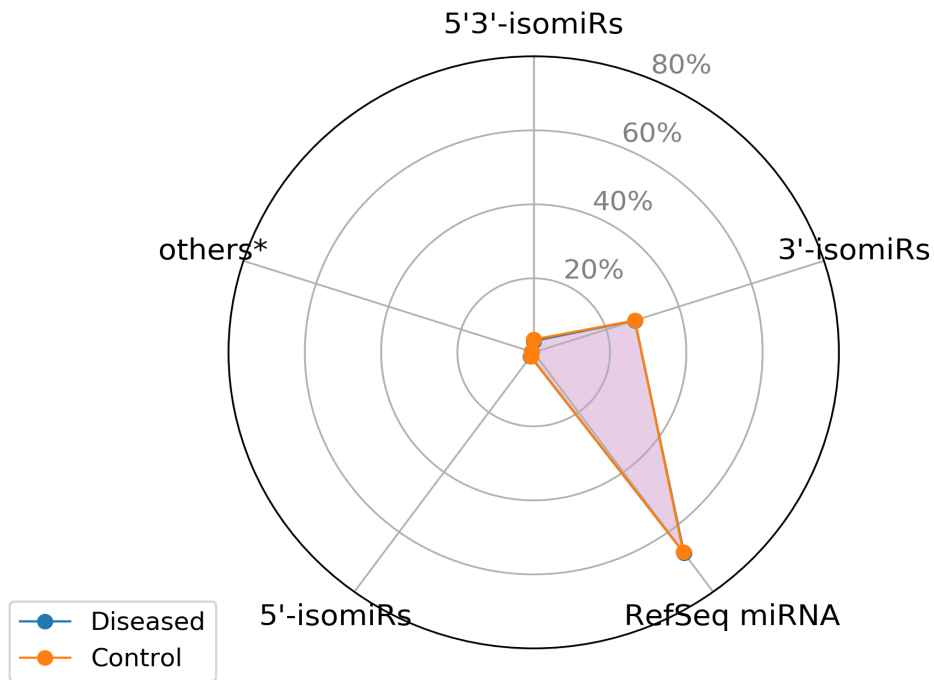

## Templated isomiR profile (non-redundant reads)

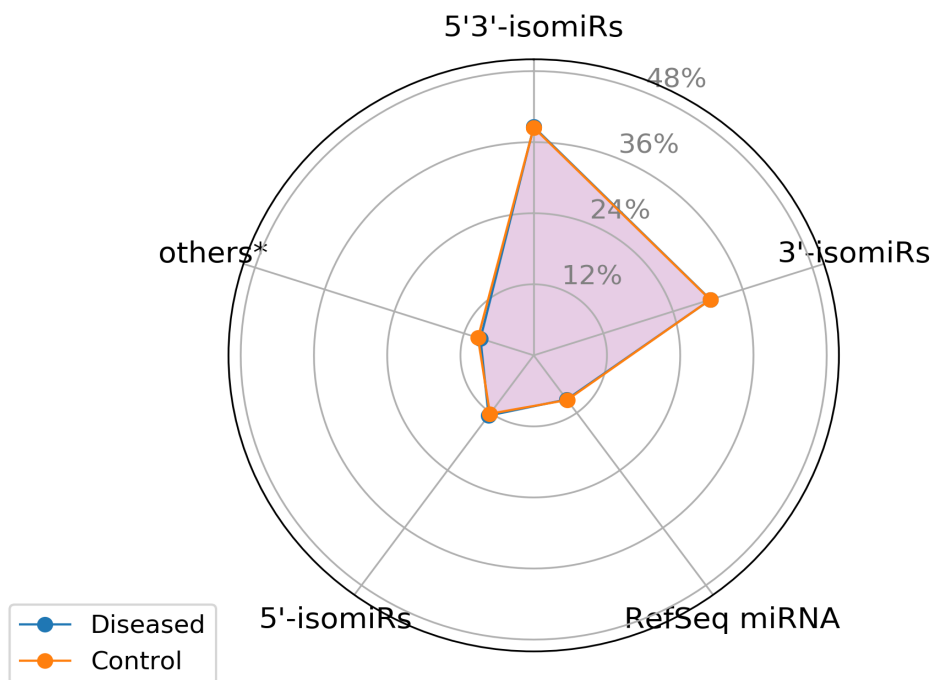

\* IsomiRs potentially generated from multiple loci

# Non-templated isomiRs

## 3'-end additions to RefSeq miRNAs and templated isomiRs

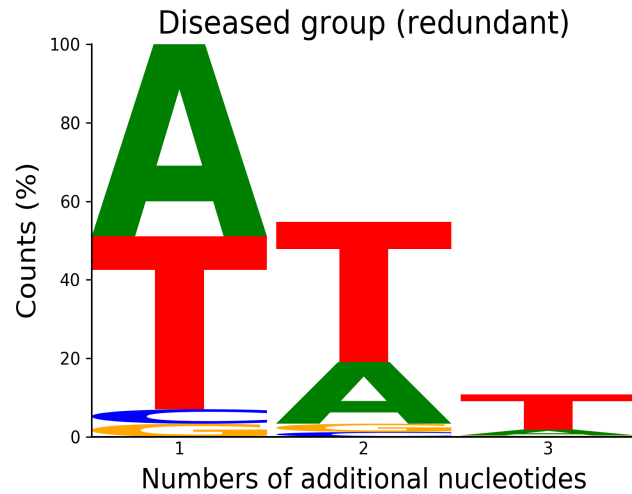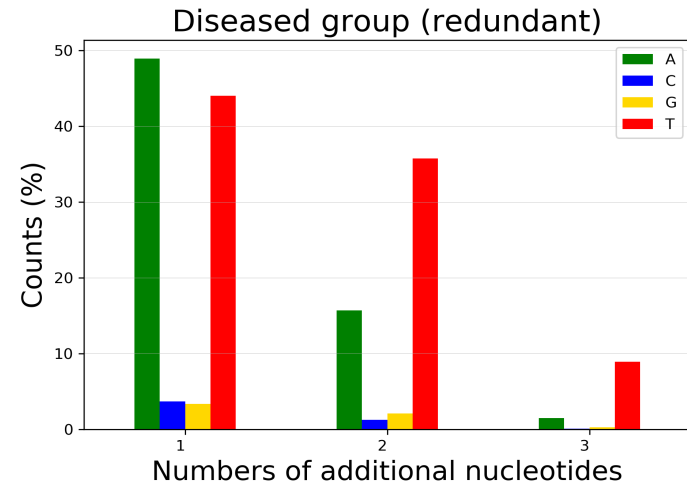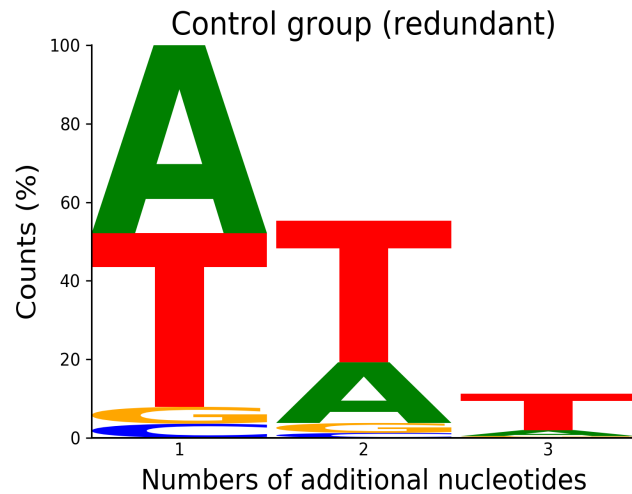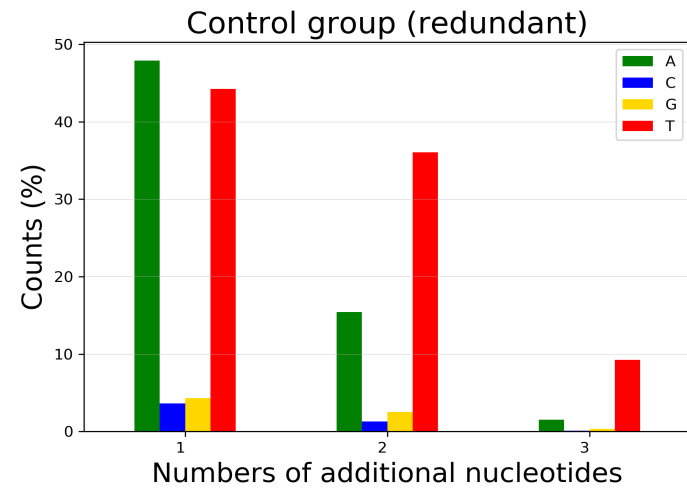

Supplement: s1 [file s1]
