# Supplementary material for: miRGalaxy: Galaxy-Based Framework for Interactive Analysis of microRNA and isomiR Sequencing Data
Source: MDPI journal article supplement (doi:10.3390/cancers13225663), 2021-11-12

# Differential expression of miRNAs and isomiRs

## Top 20 differentially expressed miRNA and templated isoforms

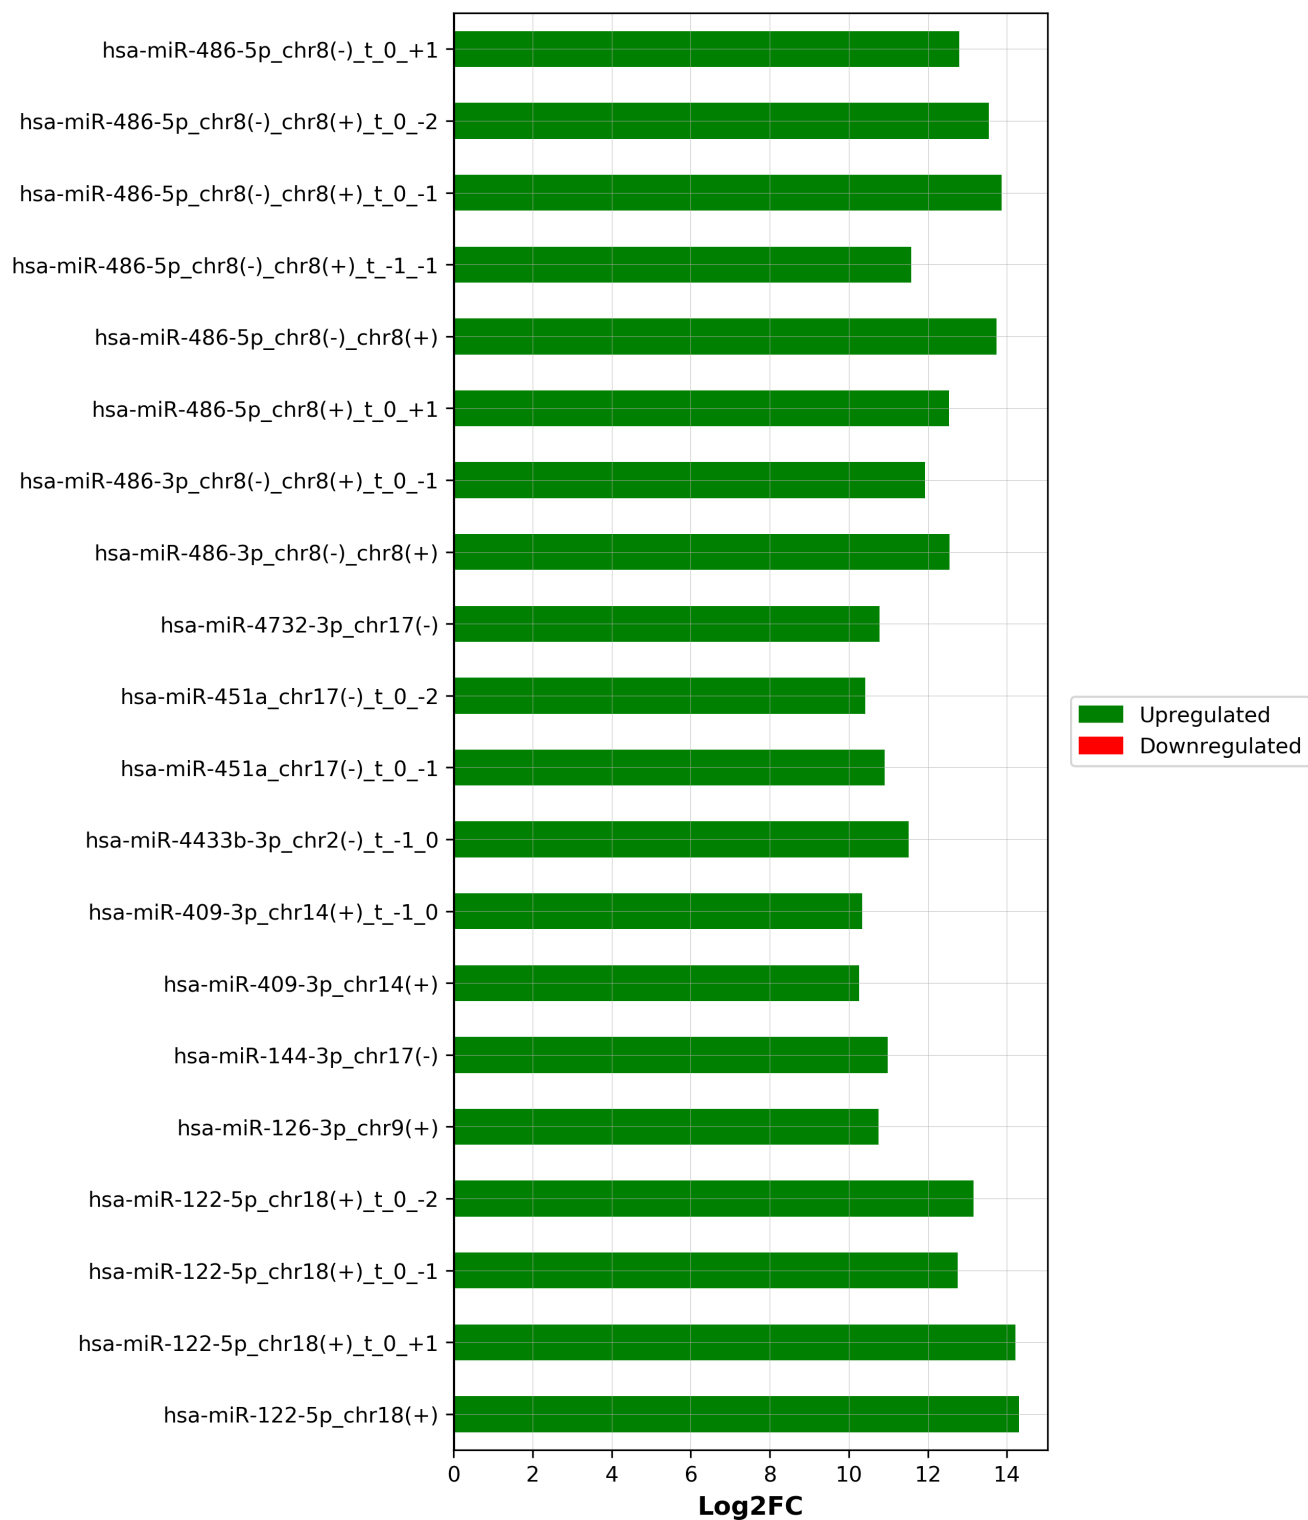

## Top 20 differentially expressed non-templated isomiRs

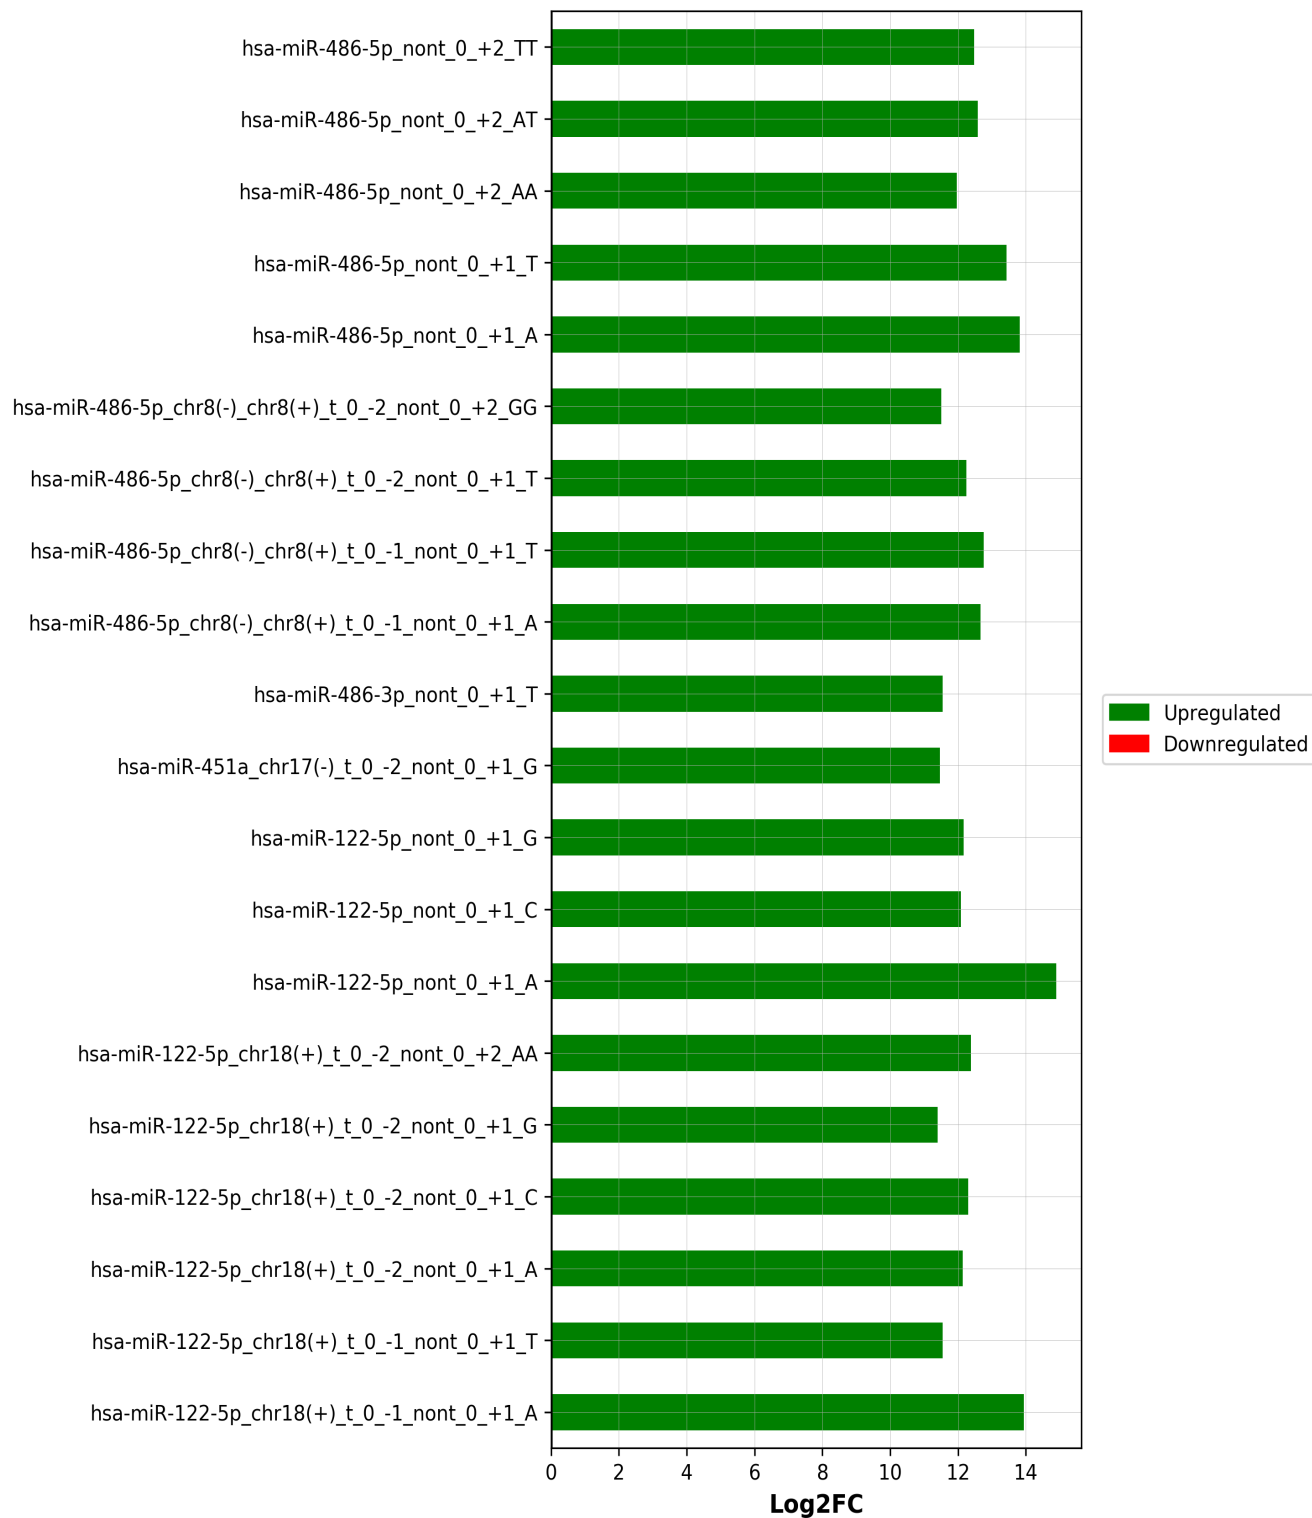

## Top differentially expressed miRNAs and isomiRs grouped by arm

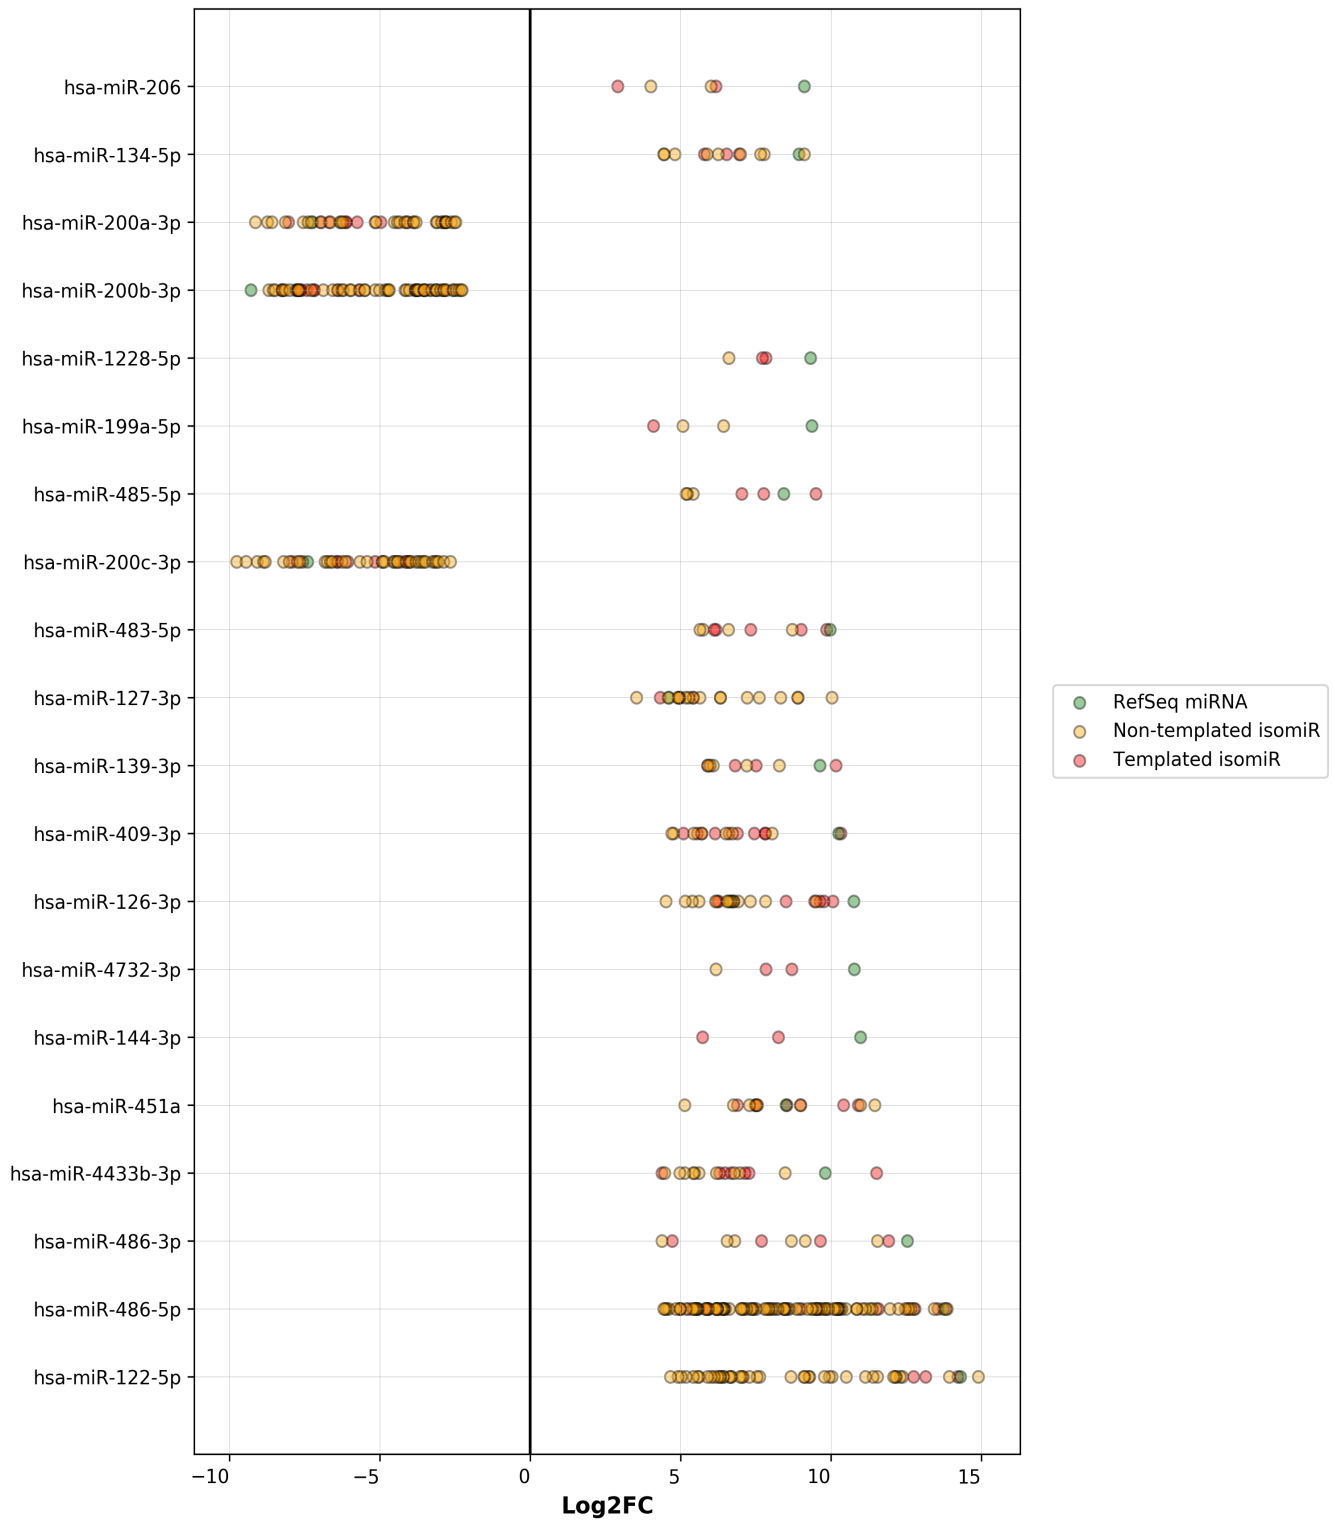

Supplement: s1 [file s1]
